# Supplementary material
Source: PubMed Central journal article supplement (PMC549483)

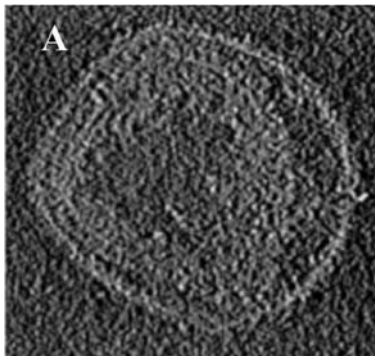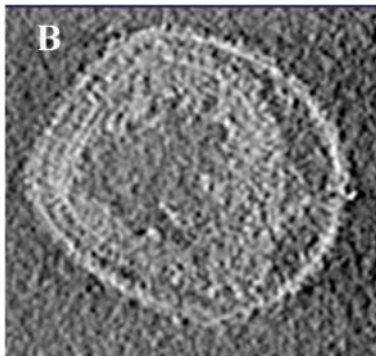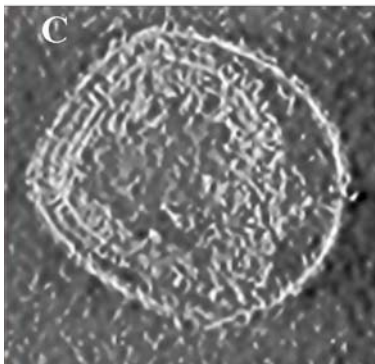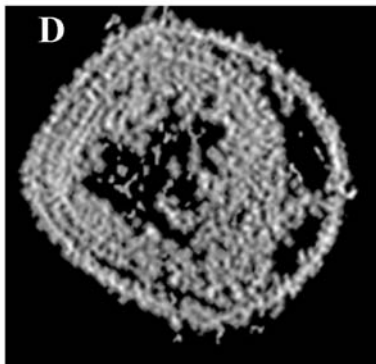

Supplement: pnas_102_8_2772__2.pdf [file pnas_102_8_2772__2.pdf]
